# Supplementary material for: Urban slum structure: integrating socioeconomic and land cover data to model slum evolution in Salvador, Brazil
Source: PubMed Central journal article supplement (PMC3924348; doi:10.1186/1476-072x-12-45), 2013-10-20

2002 Landsat TM Imagery

a) Land Cover Classification

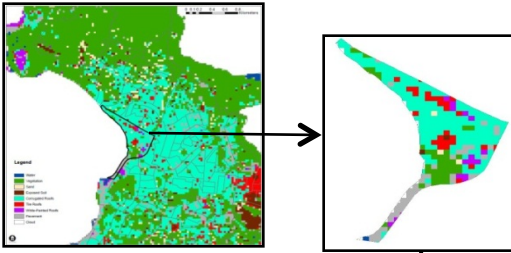

b) Texture Analysis

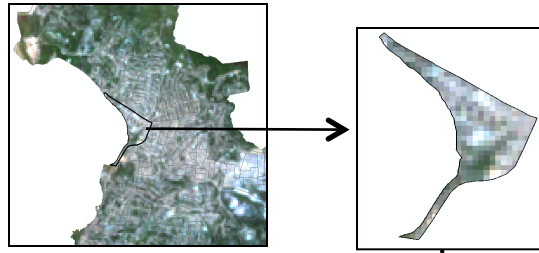

c) Extraction of Urban Land Covers

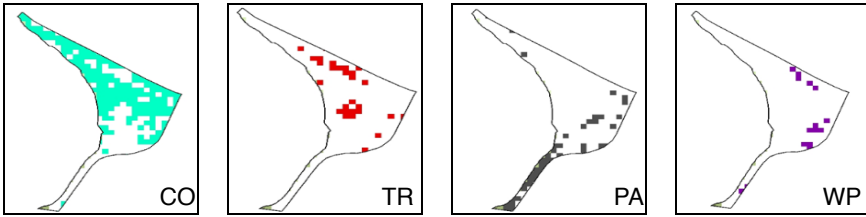

d) High Pass Filter of Red Band

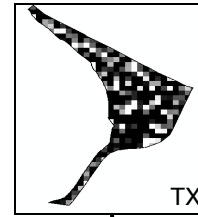

**Legend:**

- BR: Bathrooms
- GB: Garbage
- CR: Crowding
- IN: Income
- WA: Water
- CO: Corrugated roofs
- TR: Tiled Roofs
- PA: Pavement
- WP: White-painted Roofs
- TX: Texture

e) Proportion of Impervious Land covers in a 3x3 Pixel Window

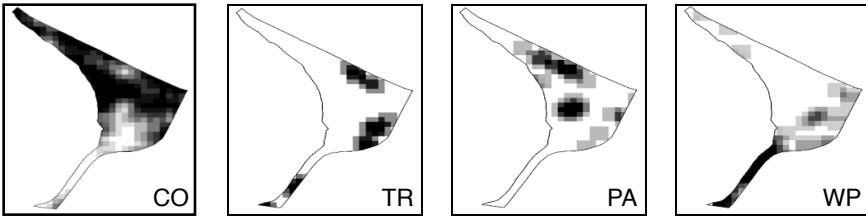

f) Standard Deviation Within a 3x3 Window

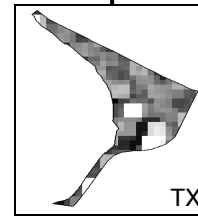

g) Dimension 1 Mapped at the Pixel Level Using Canonical Loadings as Weights (Figure 4A)

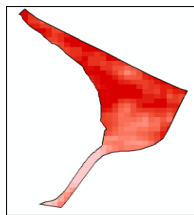

h) Dimension 2 Mapped at the Census Level Using Canonical Loadings as Weights (Figure 4B)

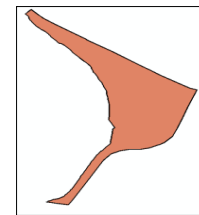

i) Final Spatial Map of Deprivation Using the Canonical Variates as Weights (Figure 5)

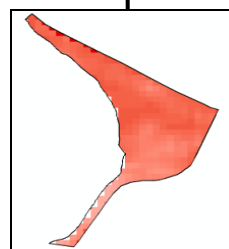

Supplement: 1476-072X-12-45-S2.pdf [file 1476-072X-12-45-S2.pdf]
